# Supplementary material
Source: PubMed Central journal article supplement (PMC3818272)
Supplement: jcbn13-54s01.pdf [file jcbn13-54s01.pdf]

**Supplemental Table 1.** Correlation between characteristics of the participants and the selected CpG sites for *SERPINE1* gene

| Characteristics                  | CpG ID | CpG1   | CpG2   | CpG3   | CpG4    | CpG5    | CpG6   | CpG7   | CpG8   | CpG9   | CpG10               |
|----------------------------------|--------|--------|--------|--------|---------|---------|--------|--------|--------|--------|---------------------|
| Body weight (kg)                 |        | -0.029 | 0.106  | -0.066 | -0.191  | -0.050  | 0.141  | 0.263  | 0.148  | 0.097  | 0.112               |
| BMI (kg/m <sup>2</sup> )         |        | -0.088 | -0.018 | 0.052  | -0.169  | -0.211  | 0.145  | 0.062  | 0.383* | 0.012  | -0.161              |
| Waist circumference (cm)         |        | 0.097  | 0.121  | 0.133  | -0.125  | -0.108  | 0.155  | 0.065  | 0.228  | 0.091  | 0.100               |
| Triceps skinfold (mm)            |        | -0.133 | 0.119  | 0.208  | 0.066   | -0.218  | 0.095  | -0.272 | 0.344* | -0.245 | -0.265 <sup>1</sup> |
| Bioimpedance Total Fat mass (%)  |        | -0.164 | 0.051  | 0.180  | -0.133  | -0.353* | 0.117  | -0.110 | 0.238  | -0.139 | -0.288 <sup>1</sup> |
| Bioimpedance Total Fat mass (kg) |        | -0.143 | 0.123  | 0.075  | -0.231  | -0.274  | 0.196  | 0.117  | 0.271  | -0.021 | -0.123              |
| DXA Total Fat mass (%)           |        | -0.123 | 0.083  | 0.224  | -0.009  | -0.333* | 0.187  | -0.242 | 0.220  | -0.106 | -0.369*             |
| DXA Trunk Fat mass (%)           |        | -0.156 | 0.303* | 0.287  | -0.152  | -0.221  | 0.358* | -0.106 | -0.007 | 0.022  | -0.258 <sup>1</sup> |
| DXA Android Fat mass (%)         |        | -0.147 | 0.331* | 0.289  | -0.150  | -0.232  | 0.383* | -0.113 | -0.032 | 0.021  | -0.019              |
| DXA Total Fat mass (kg)          |        | -0.116 | 0.176  | 0.086  | -0.173  | -0.259  | 0.258  | 0.069  | 0.272  | 0.023  | -0.153              |
| Glucose (mg/dl)                  |        | 0.132  | -0.096 | 0.374* | 0.164   | -0.201  | 0.198  | -0.142 | 0.153  | 0.173  | -0.191              |
| Insulin (μU/ml)                  |        | -0.087 | 0.095  | 0.005  | -0.135  | -0.091  | -0.039 | 0.147  | 0.126  | -0.031 | 0.088               |
| HOMA-IR                          |        | -0.001 | 0.024  | 0.133  | -0.051  | -0.127  | 0.098  | 0.131  | 0.116  | 0.047  | 0.000               |
| Total cholesterol (mg/dl)        |        | -0.009 | 0.152  | -0.104 | -0.044  | 0.258   | -0.036 | -0.074 | -0.201 | 0.139  | 0.115               |
| HDL-c (mg/dl)                    |        | 0.017  | -0.043 | -0.197 | -0.099  | 0.065   | 0.010  | 0.035  | -0.069 | 0.076  | 0.072               |
| Triglycerides (mg/dl)            |        | -0.228 | 0.274  | 0.228  | -0.064  | -0.032  | -0.023 | -0.083 | 0.026  | -0.121 | 0.055               |
| SBP (mmHg)                       |        | 0.086  | -0.031 | 0.208  | -0.151  | -0.149  | 0.170  | 0.067  | -0.001 | -0.123 | 0.138               |
| DBP (mmHg)                       |        | -0.131 | -0.005 | 0.200  | -0.308* | -0.329* | -0.010 | 0.131  | 0.195  | -0.256 | 0.019               |
| CRP (mg/l)                       |        | -0.002 | 0.013  | 0.061  | -0.167  | -0.048  | 0.178  | 0.105  | 0.132  | -0.027 | -0.109              |
| PAI-1 (ng/ml)                    |        | 0.227  | -0.119 | 0.276  | 0.043   | -0.133  | 0.136  | 0.046  | 0.261  | 0.160  | -0.070              |
| IL-6 (pg/ml)                     |        | -0.086 | 0.229  | 0.300  | -0.058  | -0.143  | 0.185  | -0.109 | 0.233  | 0.093  | -0.314*             |
| TNF-α (pg/ml)                    |        | 0.044  | -0.182 | -0.104 | -0.156  | -0.065  | -0.036 | 0.203  | -0.108 | -0.028 | 0.277 <sup>1</sup>  |
| Energy intake (kcal)             |        | -0.035 | 0.101  | -0.119 | -0.113  | 0.087   | 0.070  | 0.287  | -0.071 | 0.125  | 0.226               |

\* $p < 0.05$ ; <sup>1</sup> $p < 0.100$ . BMI: body mass index; DXA: dual-energy x-ray absorptiometry; HOMA-IR: homeostasis model assessment-insulin resistance; HDL-c: high density lipoprotein cholesterol; SBP: systolic blood pressure; DBP: diastolic blood pressure; CRP: c-reactive protein; PAI-1: plasminogen activator inhibitor-1; IL-6: interleukin-6; TNF-α: tumor necrosis factor-α.
